# Supplementary material for: Electronic properties and interfacial contact of graphene/CrSiTe3 van der Waals heterostructures
Source: Royal Society of Chemistry journal article supplement (doi:10.1039/d1cp04109f), 2022-01-01
Supplement: d1cp04109f1.pdf [file d1cp04109f1.pdf]

## **Electronic properties and interface contact of graphene/CrSiTe<sub>3</sub> van der Waals heterostructures**

Li Chen,<sup>\*a,c</sup> Chuan Jiang,<sup>\*b</sup> Maoyong Yang,<sup>a</sup> Dongchao Wang,<sup>c</sup> Changmin Shi,<sup>c</sup>  
Hongmei Liu,<sup>c</sup> Guangliang Cui,<sup>c</sup> Xiaolong Li,<sup>c</sup> Jiakuo Shi<sup>a</sup>

<sup>a</sup>*International School of photoelectronic engineering, Qilu University of Technology,  
Jinan 250353, China*

<sup>b</sup>*Tech Center, CRRC Qingdao Sifang Rolling Stock Research Institute Co., Ltd,  
Shanghai 200333, China*

<sup>c</sup>*Institute of Condensed Matter Physics, Linyi University, Shandong 276000, China*

Table S1(a) Magnetic moment of atoms in the of graphene/CrSiTe<sub>3</sub> at  $d=3.19$  Å

| direction   | Cr           | Si           | Te            |
|-------------|--------------|--------------|---------------|
| In plane    | $3.38 \mu_B$ | $0.010\mu_B$ | $0.102\mu_B$  |
| Z direction | $0.02 \mu_B$ | $0.001\mu_B$ | $-0.010\mu_B$ |

Table S1(b) Magnetic moment of atoms in the of graphene/CrSiTe<sub>3</sub> at  $d=2.75$  Å

| direction   | Cr            | Si            | Te             |
|-------------|---------------|---------------|----------------|
| In plane    | $2.82 \mu_B$  | $0.001\mu_B$  | $0.062\mu_B$   |
| Z direction | $-0.68 \mu_B$ | $-0.004\mu_B$ | $-0.028 \mu_B$ |

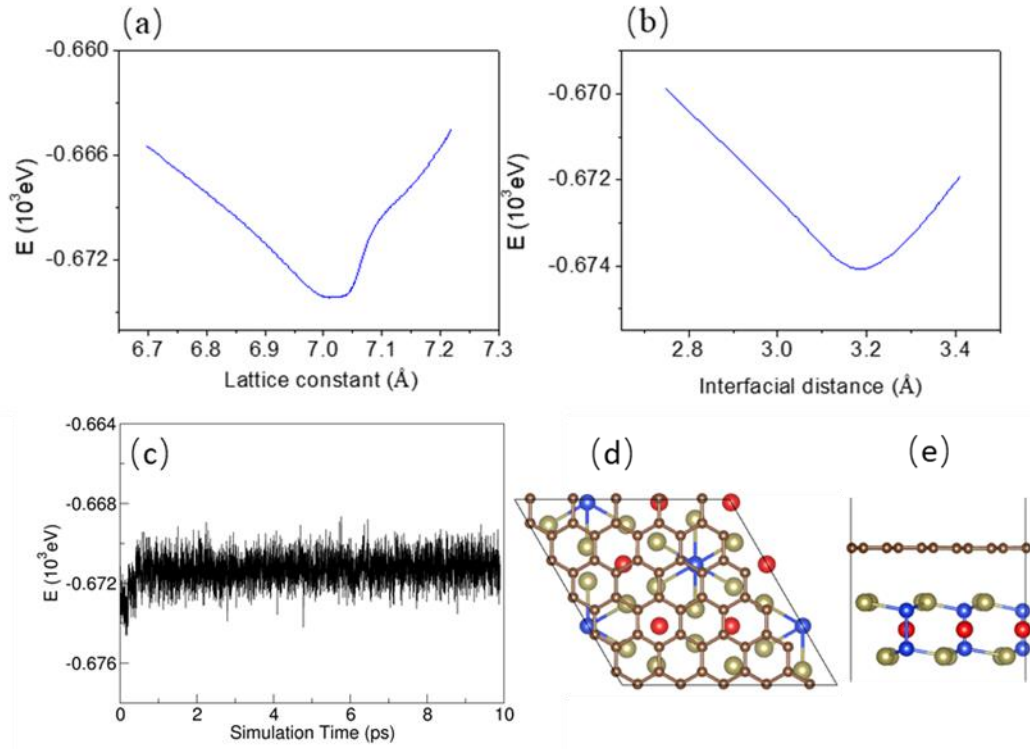

Fig. S1 (a) The calculated total energy of the Gr/CrSiTe<sub>3</sub> heterostructure as a function of the lattice constant of CrSiTe<sub>3</sub>; (b) The calculated total energy of the Gr/CrSiTe<sub>3</sub> heterostructure as a function of the interfacial distance; (c) Ab initio molecular dynamics simulations of Gr/CrSiTe<sub>3</sub> at 300 K; (d) and (e) the final structure after 10 ps, showing that the Graphene/CrSiTe<sub>3</sub> heterostructure remains stable.

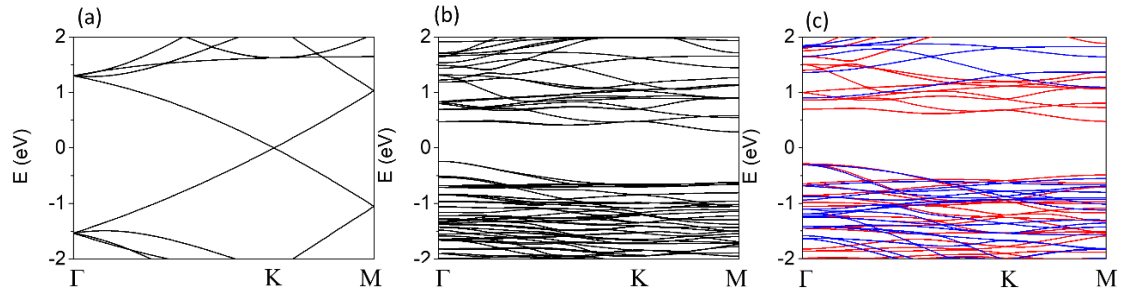

Fig. S2 (a) Band structures of graphene; (b) Band structures of CrSiTe<sub>3</sub> ML with SOC interaction and (c) The spin-polarized band structure of the CrSiTe<sub>3</sub> ML, red for spin-up and blue for spin-down.

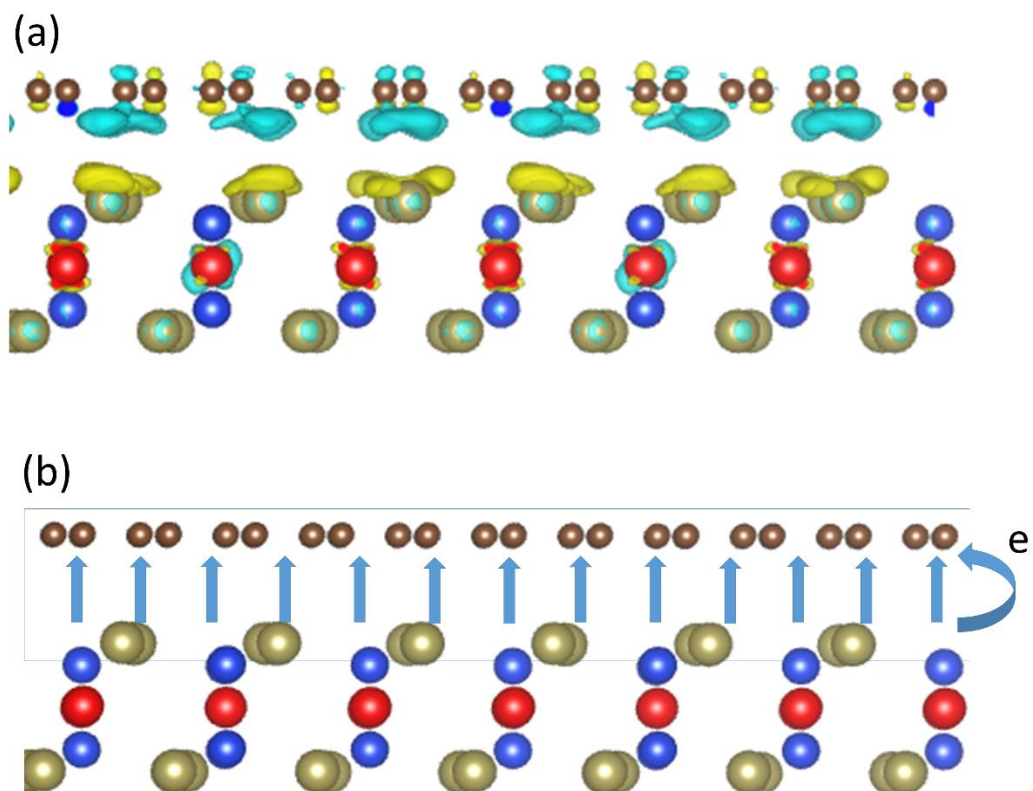

Fig. S3 (a) Charge density difference of the graphene/CrSiTe<sub>3</sub> at the interfacial distance  $d=2.75$  Å. The isosurface refers to isovalues of  $0.001 e \text{ Å}^{-3}$ . (b) Schematic diagram of the built-in electric field at the graphene/CrSiTe<sub>3</sub> interface.

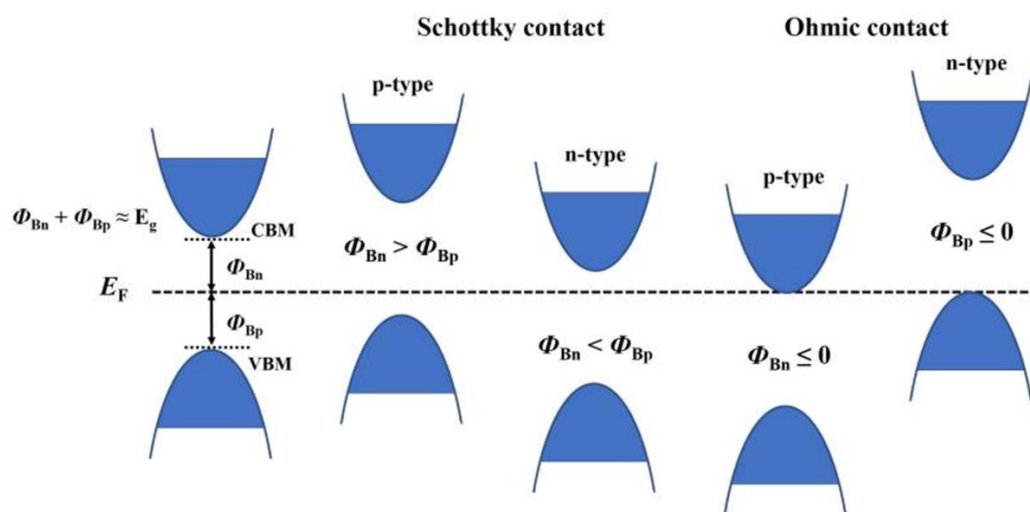

Fig. S4 Diagrammatic illustration of the p-type and n-type Schottky and Ohmic contact at the interface region.

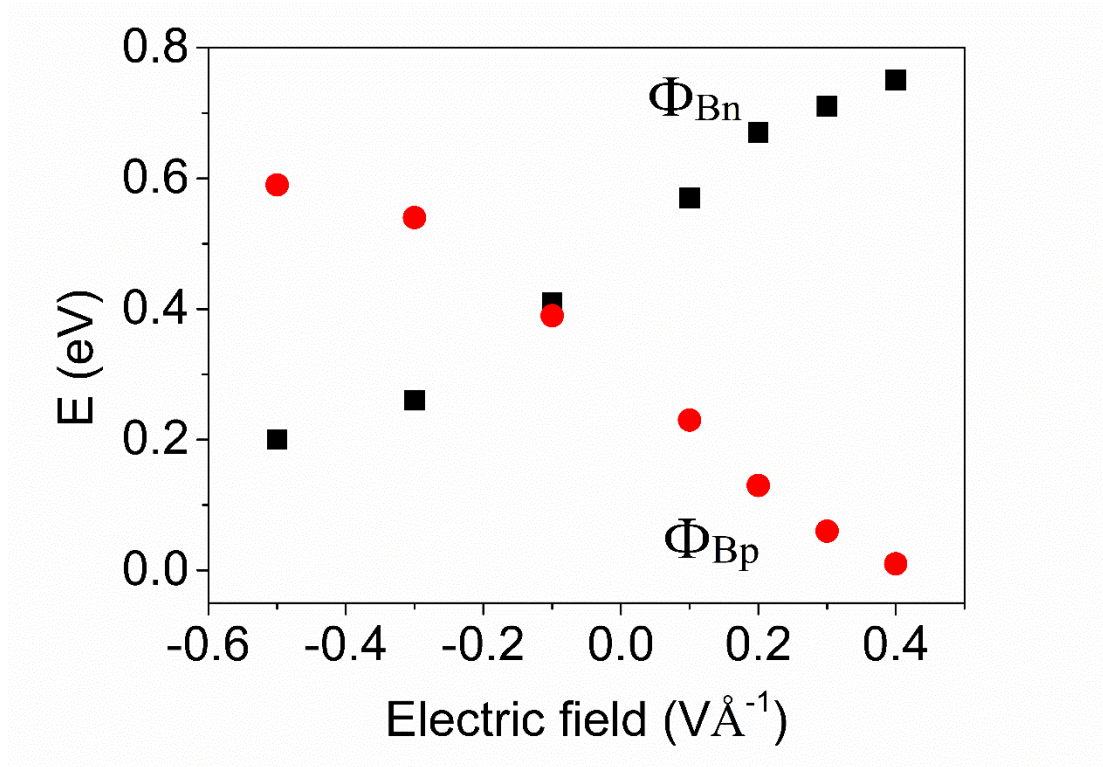

Fig. S5 The SBH of the graphene/CrSiTe<sub>3</sub> as a function of the external electric field. The n-type Schottky barrier ( $\Phi_{Bn}$ ) noted in black color is the energy difference between the  $E_{CBM}$  and the  $E_F$ , while the p-type Schottky barrier ( $\Phi_{Bp}$ ) noted in red color is the energy difference between the  $E_F$  and the  $E_{VBM}$ .
